# Supplementary material for: Individual and Community-Level Risk Factors for Giardiasis in Children under Five Years of Age in Pakistan: A Prospective Multi-Regional Study
Source: MDPI journal article supplement (doi:10.3390/children10061087), 2023-06-20
Supplement: s1 [file s1]

## **Questionnaire**

**Title:** A study of individual and community-level risk factors for giardiasis in children under five in Khyber Pakhtunkhwa, Pakistan

**Institute:** Abdul Wali Khan University, Mardan, KP, Pakistan

**Study Period:** March to December 2022

**Outcome:** To determine the prevalence of *G. lamblia* infection in a healthy pediatric population across several agro-ecological zones of Khyber Pakhtunkhwa, Pakistan, and to identify any potential individual and community-level risk factors.

### **Personal Information**

**Respondent's ID** \_\_\_\_\_

**Sample No.** \_\_\_\_\_

**Respondent's Name** \_\_\_\_\_

**Father Name:** \_\_\_\_\_

**Gender:** \_\_\_\_\_

**Age (months):**

- 0-6
- 7-12
- 13-24
- 25-36
- 37-48
- 49-60

**Family size**

- <6
- >6

**Mother's educational level**

- Can't read and write
- Primary
- Secondary
- Higher education

**Father's educational level**

- Can't read and write
- Primary
- Secondary
- Higher education

**Attend day care institution/Kindergarten**

- Yes
- No

**Handwashing behavior**

- Washes at critical times
- Does not wash at critical times

**Companion animal**

- Yes
- No

**Stray dogs/ cats enter home**

- Yes
- No

**Agro-ecological zones**

- High dry mountains
- Sub mountain valleys
- Sub humid mountains
- Wet mountains
- Valley plains
- Piedmont plain
- Semi-arid piedmont
- Western mountains
- Desert plains

**Drinking water sources**

- Piped
- Un-piped

**Domestic water storage vessel**

- Adequate
- Inadequate

**Drinking water boiled or filtered**

- Yes
- No

**Presence of rubbish heap near house**

- Not present
- Present

**Condition of street or pathway**

- Paved
- Unpaved

**Latrine facilities**

- Improved
- Unimproved

### **Patient's consent**

I Mr/Mrs/Miss \_\_\_\_\_ Guardian of \_\_\_\_\_ give my consent for personal and clinical information related to the child that this data will be used for research purpose and will be published without our personal identity.

Signature of Child Guardian: \_\_\_\_\_

Date: \_\_\_\_\_
